# Supplementary material for: RLP1.1, a novel wheat receptor-like protein gene, is involved in the defence response against Puccinia striiformis f. sp. tritici
Source: PubMed Central journal article supplement — J Exp Bot. 2013 Jul 23;64(12):3735–46. doi: 10.1093/jxb/ert206 (PMC3745730; doi:10.1093/jxb/ert206), 2013-07-23
Supplement: supp_ert206_jexbot093286_file001.pdf [file supp_ert206_jexbot093286_file001.pdf]

## RESEARCH PAPER

### Title:

***TaRLP1.1*, a Novel Wheat Receptor-Like Protein Gene, is Involved in the Defense Response against *Puccinia striiformis* f. sp. *tritici***

Zhengning Jiang<sup>1</sup>, Shuai Ge<sup>1</sup>, Liping Xing<sup>1</sup>, Dejun Han<sup>2</sup>, Zhensheng Kang<sup>2</sup>, Guoqin Zhang<sup>1</sup>, Xiaojie Wang<sup>2</sup>, Xiue Wang<sup>1</sup>, Peidu Chen<sup>1,\*</sup>, Aizhong Cao<sup>1,\*</sup>

<sup>1</sup>National Key Laboratory of Crop Genetics and Germplasm Enhancement, Cytogenetics Institute, Nanjing Agricultural University, Nanjing, Jiangsu 210095, China

<sup>2</sup>State Key Laboratory of Crop Stress Biology for Arid Areas and College of Plant Protection, Northwest A&F University, Yangling, Shaanxi 712100, China

## Supplementary Data

Supplementary data are available at *JXB* online

**Supplementary Table S1.** Designed primers

**Supplementary Table S2.** The up-regulated folds of *Ta.22666.2.S1\_at* and *TaAffx.55699.1.S1\_at* between the different samples of tests and the controls

**Supplementary Table S3 .** The genes identified in resistant cv. 92R137 and susceptible cv. Yangmai158

**Supplementary Fig. S1.** The primary structure and conserved domains of *TaRLP1.1*.

(A) Predicted protein structure of *TaRLP1.1*. (B) The sequence (1-22aa) represents a signal peptide (SP) (a). The sequence (96–167aa) represents the LRRs domain (b). In the LRR domains there are several 23–25-aa plant-specific extracellular LRR motifs ‘LxxLxLxxNxLt/SGxIP’; conserved L, S, G, I and P marked with red . The sequence (233–255aa) represents the transmembrane (TM) region that contains the ‘GxxxG’ motifs (c), and the conserved G in the GxxxG-type motifs are marked with green. A short cytoplasmatic tail (d) contains the ‘Yxxφ’ motif (‘φ’ represents any bulky, hydrophobic amino acid), and the conserved ‘Y’ and ‘φ’ are marked with yellow.

**Supplementary Fig. S2.** Chromosomal location of *TaRLP1.1*, *TaRLP1<sub>804-1</sub>* and *TaRLP1<sub>813</sub>* with specific primers using the nulli-tetrasomic (NT) lines derived from cv. Chinese Spring. *TaRLP1.1* was located to the chromosome 3D, *TaRLP1<sub>804-1</sub>* to 3B, and *TaRLP1<sub>813</sub>* to 3A.

**Supplementary Fig. S3.** Phylogenetic analysis of the DNA sequence of *TaRLP1* genes from common wheat using the MEGA 4.0. Bootstrap values are shown above nodes. Scale bar represents 0.05 nucleotide substitutions per site. The Genbank accession numbers are JX198219 (*TaRLP1<sub>738</sub>*), JX198220 (*TaRLP1<sub>800-1</sub>*), JX198221 (*TaRLP1<sub>800-1</sub>*), JX198222 (*TaRLP1<sub>801-2</sub>*), JX198223 (*TaRLP1<sub>801-3</sub>*), JX198224 (*TaRLP1<sub>801-4</sub>*), JX198218 (*TaRLP1.1*), JX198225 (*TaRLP1<sub>801-5</sub>*), JX198226 (*TaRLP1<sub>804-1</sub>*), JX198227 (*TaRLP1<sub>804-2</sub>*), JX198228 (*TaRLP1<sub>804-3</sub>*), JX198229 (*TaRLP1<sub>804-4</sub>*), JX198230 (*TaRLP1<sub>813</sub>*).

**Supplementary Fig. S4.** The multi-sequence alignment of the identified *RLP* genes from the stripe rust resistant wheat cv. 92R137 and susceptible cv. Yangmai158.

**Supplementary Fig. S5.** The multi-sequence alignment of the deduced proteins of the identified *RLP* genes from the stripe rust resistant wheat cv. 92R137 and susceptible cv. Yangmai158.

**Supplementary Fig. S6.** Sequence alignment and phylogenetic analysis of TaRLP1.1 and other putative RLP proteins using DNAMAN. (A) Alignment of the amino acid sequence of *TaRLP1.1* with other putative RLP proteins from *Oryza sativa* (BAF06973.1), *Hordeum vulgare* (BAJ87832.1), *Aegilops tauschii* (EMT19838.1) *Arabidopsis* (AtRLP44, AEE78586.1) and *Sorghum bicolor* (EES01889.17). Identical residues in all organisms are shaded. Underlines indicate sequence domains involved RLPs. (B) A representative phylogenetic tree of TaRLP1.1 and selected putative RLP proteins.

**Supplementary Fig. S7.** Subcellular localization of TaRLP1.1 protein. Onion epidermal cells were transformed with plasmids expressing the fusion protein and green fluorescent protein (GFP) by bombardment. All images were observed with a confocal microscope. (A) Onion epidermal cells expressing the GFP alone driven by the 35 S promoter. (B) Onion epidermal cells expression the TaRLP1.1-GFP fusion protein (Bars = 100µm).

**Supplementary Fig. S8.** Expression analysis by the semi-quantitative RT-PCR of three pathogenesis-related genes, including *TaPR1*, *TaPR2* and *TaPR5*, at both 72 and 120 h after CYR32 inoculation in the BSMV: TaRLP1.1 as infected plants and the BSMV infected control plants. *Tubulin* gene was used as the internal control.

**Supplementary Fig. S9.** Identification of positive transgenic plants by GUS staining, gene detection and gene expression analysis. (A) GUS staining of the root tips of the T<sub>1</sub> generation transgenic lines. '+' indicates positive GUS staining and '-' indicates negative GUS staining. (B) *Gus* and *TaRLP1.1* detection in some of the T<sub>0</sub> and T<sub>1</sub> plants by PCR. '+': the positive control using the vector as the template; '-': the negative control using H<sub>2</sub>O as the template. (C) Expression analysis of *TaRLP1.1* in the identified positive transgenic plants. *Tubulin* gene was used as the internal control.

**Supplementary Fig. S10.** Positive *TaRLP1.1* transgenic plants showed robust hypersensitive response to *Pst* 15 days after inoculation. The red arrows indicated the

inoculated leaves. 723-3 and 723-7 indicated T<sub>1</sub> generation plants of two individual T<sub>0</sub> plants, Y158 indicated the susceptible control cv. Yang158, and 92R137 indicates the resistant control line.

**Supplementary Fig. S11.** Expression analysis by semi-quantitative RT-PCR of three pathogenesis-related genes, including *TaPR1*, *TaPR2* and *TaPR5*, at both 72 and 120 h after CYR32 inoculation in *TaRLP1.1* over-expressed transgenic plants, the *Yr26* containing cv. 92R137 and the susceptible recipient. Yangmai158. *Tubulin* gene was used as the internal control.

Supplementary Fig. S1

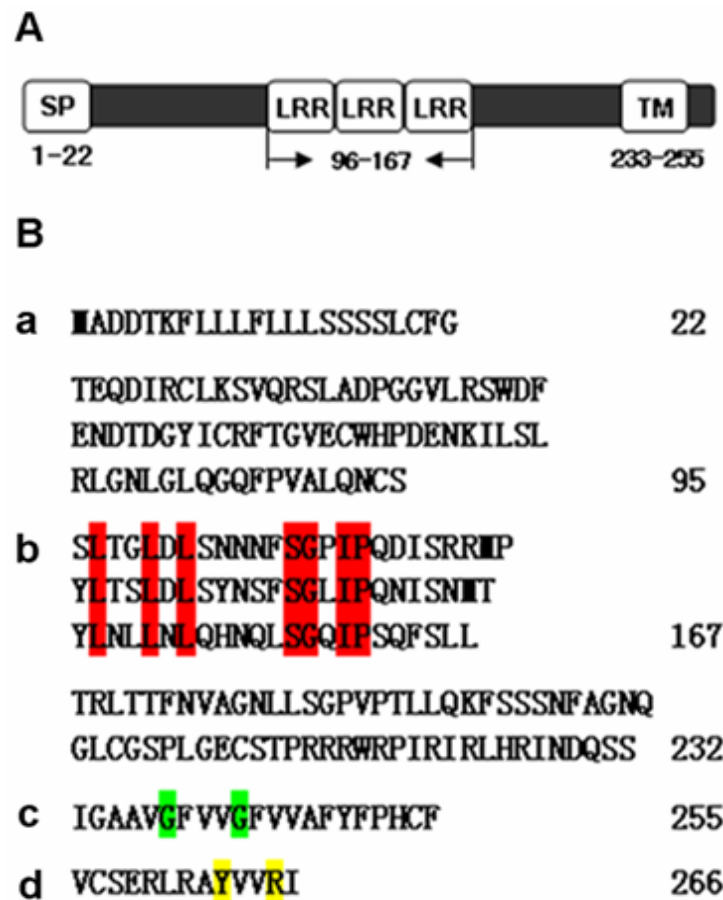

**Supplementary Fig. S1.** The primary structure and conserved domains of TaRLP1.1. (A) Predicted protein structure of TaRLP1.1. (B) The sequence (1-22aa) represents a signal peptide (SP) (a). The sequence (96-167aa) represents the LRRs domain (b). In the LRR domains there are several 23 to 25aa plant-specific extracellular LRR motif ‘LxxLxLxxNxLt/SGxIP’, conserved L, S, G, I and P marked with red. The sequence (233-255aa) represents the transmembrane (TM) region that contains the ‘GxxxG’ motifs (c), where the conserved G in the GxxxG-type motifs are marked with green. A short cytoplasmic tail (d) contained the ‘Yxxφ’ motif (where ‘φ’ represents any bulky, hydrophobic amino acid), and the conserved ‘Y’ and ‘φ’ are marked with yellow.

Supplementary Fig. S2

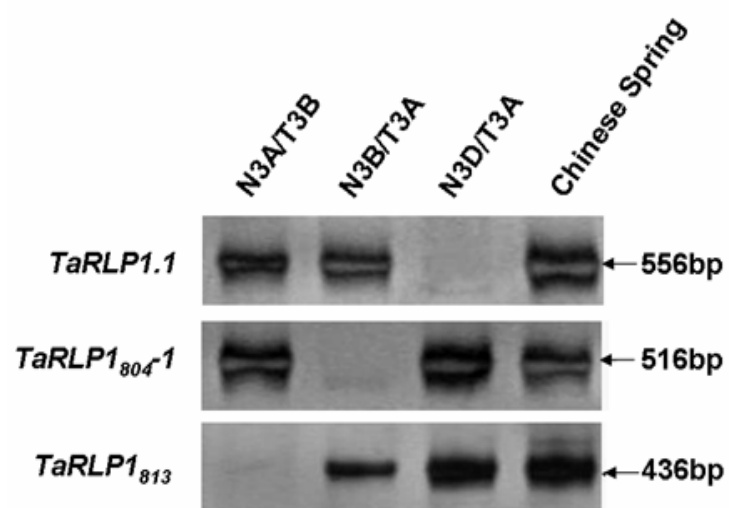

**Supplementary Fig. S2.** Chromosomal location of the *TaRLP1.1*, *TaRLP1<sub>804-1</sub>* and *TaRLP1<sub>813</sub>* with specific primers using the nulli-tetrasomic (NT) lines derived from Chinese Spring. The *TaRLP1.1* was located to the 3D chromosome, *TaRLP1<sub>804-1</sub>* to the 3B, and *TaRLP1<sub>813</sub>* to the 3A.

**Supplementary Fig. S3**

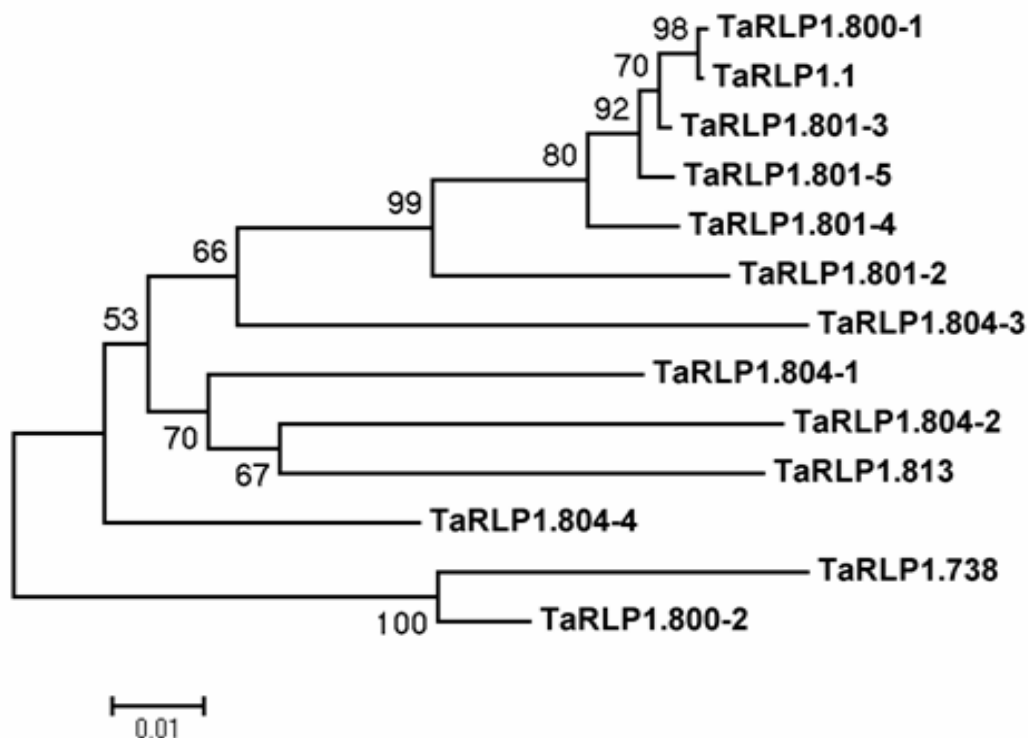

**Supplementary Fig. S3.** The phylogenetic analysis of the DNA sequence of *TaRLP1* genes from common wheat using the MEGA 4.0. Bootstrap values are shown above nodes. Scale bar represents 0.05 nucleotide substitutions per site.

The Genbank accession numbers are JX198219 (*TaRLP1*<sub>738</sub>), JX198220 (*TaRLP1*<sub>800-1</sub>), JX198221 (*TaRLP1*<sub>800-2</sub>), JX198222 (*TaRLP1*<sub>801-2</sub>), JX198223 (*TaRLP1*<sub>801-3</sub>), JX198224 (*TaRLP1*<sub>801-4</sub>), JX198218 (*TaRLP1.1*), JX198225 (*TaRLP1*<sub>801-5</sub>), JX198226 (*TaRLP1*<sub>804-1</sub>), JX198227 (*TaRLP1*<sub>804-2</sub>), JX198228 (*TaRLP1*<sub>804-3</sub>), JX198229 (*TaRLP1*<sub>804-4</sub>), JX198230 (*TaRLP1*<sub>813</sub>).





|          |                                                                                                    |     |
|----------|----------------------------------------------------------------------------------------------------|-----|
| JX198218 | CAATTTGCTTACTCGGTTAACTACGTTCAATGTTGCGGGCAACTTGTATACAGGGCCTGTTCCACTTTGCTACAGA...AGTTTTCGTCTCAAAGTTT | 588 |
| JX198219 | CGATTTGCTTACTCGGTTAACTACGTTCAAT.....TTTT                                                           | 525 |
| JX198220 | CAATTTGCTTACTCGGTTAACTACGTTCAATGTTGCGGGCAACTTGTATACAGGGCCTGTTCCACTTTGCTACAGA...AGTTTTCGTCTCAAAGTTT | 587 |
| JX198221 | CAATTTGCTTACTCGGTTAACTACGTTCAATGTTGCGGGCAACTTGTATACAGGGCCTGTTCCACTTTGCTACAGA...AGTTTTCGTCTCAAAGTTT | 587 |
| JX198222 | CAATTTGCTTACTCGGTTAACTACGTTCAATGTTGCGGGCAACTTGTATACAGGGCCTGTTCCACTTTGCTACAGA...AGTTTTCGTCTCAAAGTTT | 588 |
| JX198223 | CAATTTGCTTACTCGGTTAACTACGTTCAATGTTGCGGGCAACTTGTATACAGGGCCTGTTCCACTTTGCTACAGA...AGTTTTCGTCTCAAAGTTT | 588 |
| JX198224 | CAATTTGCTTACTCGGTTAACTACGTTCAATGTTGCGGGCAACTTGTATACAGGGCCTGTTCCACTTTGCTACAGA...AGTTTTCGTCTCAAAGTTT | 588 |
| JX198225 | CAATTTGCTTACTCGGTTAACTACGTTCAATGTTGCGGGCAACTTGTATACAGGGCCTGTTCCACTTTGCTACAGA...AGTTTTCGTCTCAAAGTTT | 588 |
| JX198226 | CGATTTGCTTACTCGGTTAACTACGTTCAATGTTGCGGGCAACTTGTATACAGGGCCTGTTCCACTTTGCTACAGA...AGTTTTCGTCTCAAAGTTT | 591 |
| JX198227 | CGATTTGCTTACTCGGTTAACTACGTTCAATGTTGCGGGCAACTTGTATACAGGGCCTGTTCCACTTTGCTACAGA...AGTTTTCGTCTCAAAGTTT | 591 |
| JX198228 | GGATTTGCTTACTCGGTTAACTACGTTCAATGTTGCGGGCAACTTGTATACAGGGCCTGTTCCACTTTGCTACAGA...AGTTTTCGTCTCAAAGTTT | 591 |
| JX198229 | CGATTTGCTTACTCGGTTAACTACGTTCAATGTTGCGGGCAACTTGTATACAGGGCCTGTTCCACTTTGCTACAGA...AGTTTTCGTCTCAAAGTTT | 591 |
| JX198230 | CGATTTGCTTACTCGGTTAACTACGTTCAATGTTGCGGGCAACTTGTATACAGGGCCTGTTCCACTTTGCTACAGA...AGTTTTCGTCTCAAAGTTT | 600 |
|          |                                                                                                    |     |
| JX198218 | GCTGGAACCAAGGCTTTTGCTTTCACCTTTAGATGATGCTCCACCCTTCGAGGAGATGGAGACCGATACGAATCAGGCTGCACAGGATCAAACGAC   | 688 |
| JX198219 | ACTGGAACCAAGGCTTTTGCTTTCACCTTTAGATGATGCTCCACCCTTCGAGGAGATGGAGACCGATACGAATCAGGCTGCACAGGATCAAACGAC   | 625 |
| JX198220 | GCTGGAACCAAGGCTTTTGCTTTCACCTTTAGATGATGCTCCACCCTTCGAGGAGATGGAGACCGATACGAATCAGGCTGCACAGGATCAAACGAC   | 687 |
| JX198221 | GCTGGAACCAAGGCTTTTGCTTTCACCTTTAGATGATGCTCCACCCTTCGAGGAGATGGAGACCGATACGAATCAGGCTGCACAGGATCAAACGAC   | 687 |
| JX198222 | GCTGGAACCAAGGCTTTTGCTTTCACCTTTAGATGATGCTCCACCCTTCGAGGAGATGGAGACCGATACGAATCAGGCTGCACAGGATCAAACGAC   | 688 |
| JX198223 | GCTGGAACCAAGGCTTTTGCTTTCACCTTTAGATGATGCTCCACCCTTCGAGGAGATGGAGACCGATACGAATCAGGCTGCACAGGATCAAACGAC   | 688 |
| JX198224 | GCTGGAACCAAGGCTTTTGCTTTCACCTTTAGATGATGCTCCACCCTTCGAGGAGATGGAGACCGATACGAATCAGGCTGCACAGGATCAAACGAC   | 688 |
| JX198225 | GCTGGAACCAAGGCTTTTGCTTTCACCTTTAGATGATGCTCCACCCTTCGAGGAGATGGAGACCGATACGAATCAGGCTGCACAGGATCAAACGAC   | 688 |
| JX198226 | GATGGAACCAAGGCTTTTGCTTTCACCTTTAGATGATGCTCCACCCTTCGAGGAGATGGAGACCGATACGAATCAGGCTGCACAGGATCAAACGAC   | 691 |
| JX198227 | GCTGGAACCAAGGCTTTTGCTTTCACCTTTAGATGATGCTCCACCCTTCGAGGAGATGGAGACCGATACGAATCAGGCTGCACAGGATCAAACGAC   | 691 |
| JX198228 | GCTGGAACCAAGGCTTTTGCTTTCACCTTTAGATGATGCTCCACCCTTCGAGGAGATGGAGACCGATACGAATCAGGCTGCACAGGATCAAACGAC   | 691 |
| JX198229 | GCTGGAACCAAGGCTTTTGCTTTCACCTTTAGATGATGCTCCACCCTTCGAGGAGATGGAGACCGATACGAATCAGGCTGCACAGGATCAAACGAC   | 691 |
| JX198230 | GCTGGAACCAAGGCTTTTGCTTTCACCTTTAGATGATGCTCCACCCTTCGAGGAGATGGAGACCGATACGAATCAGGCTGCACAGGATCAAACGAC   | 700 |
|          |                                                                                                    |     |
| JX198218 | AGTCGAGCATGAGAGCGGCCGTGGATTGTCGTGGGGTTCTGTGTGCCCTTCTACTTCCCGACTGCTTTCGTCTGTCCGAGAGGCTCCGAGCCTACGT  | 788 |
| JX198219 | AGTCGAGCATGAGAGCGGCCGTGGATTGTCGTGGGGTTCTGTGTGCCCTTCTACTTCCCGACTGCTTTCGTCTGTCCGAGAGGCTCCGAGCCTACGT  | 725 |
| JX198220 | AGTCGAGCATGAGAGCGGCCGTGGATTGTCGTGGGGTTCTGTGTGCCCTTCTACTTCCCGACTGCTTTCGTCTGTCCGAGAGGCTCCGAGCCTACGT  | 787 |
| JX198221 | AGTCGAGCATGAGAGCGGCCGTGGATTGTCGTGGGGTTCTGTGTGCCCTTCTACTTCCCGACTGCTTTCGTCTGTCCGAGAGGCTCCGAGCCTACGT  | 787 |
| JX198222 | AGTCGAGCATGAGAGCGGCCGTGGATTGTCGTGGGGTTCTGTGTGCCCTTCTACTTCCCGACTGCTTTCGTCTGTCCGAGAGGCTCCGAGCCTACGT  | 788 |
| JX198223 | AGTCGAGCATGAGAGCGGCCGTGGATTGTCGTGGGGTTCTGTGTGCCCTTCTACTTCCCGACTGCTTTCGTCTGTCCGAGAGGCTCCGAGCCTACGT  | 788 |
| JX198224 | AGTCGAGCATGAGAGCGGCCGTGGATTGTCGTGGGGTTCTGTGTGCCCTTCTACTTCCCGACTGCTTTCGTCTGTCCGAGAGGCTCCGAGCCTACGT  | 788 |
| JX198225 | AGTCGAGCATGAGAGCGGCCGTGGATTGTCGTGGGGTTCTGTGTGCCCTTCTACTTCCCGACTGCTTTCGTCTGTCCGAGAGGCTCCGAGCCTACGT  | 788 |
| JX198226 | AGTCGAGCATGAGAGCGGCCGTGGATTGTCGTGGGGTTCTGTGTGCCCTTCTACTTCCCGACTGCTTTCGTCTGTCCGAGAGGCTCCGAGCCTACGT  | 791 |
| JX198227 | AGTCGAGCATGAGAGCGGCCGTGGATTGTCGTGGGGTTCTGTGTGCCCTTCTACTTCCCGACTGCTTTCGTCTGTCCGAGAGGCTCCGAGCCTACGT  | 791 |
| JX198228 | AGTCGAGCATGAGAGCGGCCGTGGATTGTCGTGGGGTTCTGTGTGCCCTTCTACTTCCCGACTGCTTTCGTCTGTCCGAGAGGCTCCGAGCCTACGT  | 791 |
| JX198229 | AGTCGAGCATGAGAGCGGCCGTGGATTGTCGTGGGGTTCTGTGTGCCCTTCTACTTCCCGACTGCTTTCGTCTGTCCGAGAGGCTCCGAGCCTACGT  | 791 |
| JX198230 | AGTCGAGCATGAGAGCGGCCGTGGATTGTCGTGGGGTTCTGTGTGCCCTTCTACTTCCCGACTGCTTTCGTCTGTCCGAGAGGCTCCGAGCCTACGT  | 800 |
|          |                                                                                                    |     |
| JX198218 | CGTCCGGATATG                                                                                       | 800 |
| JX198219 | CGTCCGGATATG                                                                                       | 737 |
| JX198220 | CGTCCGGATATG                                                                                       | 799 |
| JX198221 | CGTCCGGATATG                                                                                       | 799 |
| JX198222 | CGTCCGGATATG                                                                                       | 800 |
| JX198223 | CGTCCGGATATG                                                                                       | 800 |
| JX198224 | CGTCCGGATATG                                                                                       | 800 |
| JX198225 | CGTCCGGATATG                                                                                       | 800 |
| JX198226 | CGTCCGGATATG                                                                                       | 803 |
| JX198227 | CGTCCGGATATG                                                                                       | 803 |
| JX198228 | CGTCCGGATATG                                                                                       | 803 |
| JX198229 | CGTCCGGATATG                                                                                       | 803 |
| JX198230 | CGTCCGGATATG                                                                                       | 812 |

**Supplementary Fig. S4.** The multi-sequence alignment of the identified *RLP* genes from the stripe rust resistant wheat cv. 92R137 and susceptible wheat cv. Yangmai158.

**Supplementary Fig. S5**

|          |                                                                                                            |     |
|----------|------------------------------------------------------------------------------------------------------------|-----|
| JX198218 | MADDTKFLLLFLLSSSSLCFGTEODTRCLKSVCFSLADPGGVLR, SWDFEN, .LTDGYICRFTGVCEWHPDENKILSLRLGNLGLQGFVVALQNCSSL       | 97  |
| JX198219 | MADDTKFLLLFLLSSSSLCFGSEDTLCLRSIQCSVIDPNSVLKSWIFEYP, .REGYICRFTGVCEWHPDENRVLVHLGNLGLQGFVVALQNCSSM           | 98  |
| JX198220 | MADDTKFLLLFLLSSSSLCFGTEODTRCLKSVCFSLADPGGVLR, SWDFEM, .TPTVTYALPFWNAGTLTRTRFSLCD                           | 77  |
| JX198221 | MADDTKFLLLFLLSSSSLCFGSEDTLCLRSIQCSVIDPNSVLKSWIFEYP, .REGYICPLLVWNAGITRTRGFSLCISTT                          | 81  |
| JX198222 | MADDTKFLRLFLLSSSSLCFGTEODTRCLM SVQSSLADPGGVLR, SWDFEN, .ETNGYICRFTGVCEWHPDENKILSLRLGNLGLQGFVVALQNCSSL      | 97  |
| JX198223 | MADDTKFLLLFLLSSSSLCFGTEODTRCLKSVCFSLADPGGVLR, SWDFEN, .LTDGYICRFTGVCEWHPDENKILSLRLGNLGLQGFVVALQNCSSL       | 97  |
| JX198224 | MADDTKFLRLFLLSSSSLCFGTEODTRCLM SVQSSLADPGGVLR, SWDFEN, .ETNGYICRFTGVCEWHPDENKILSLRLGNLGLQGFVVALQNCSSL      | 97  |
| JX198225 | MADDTKFLLLFLLSSSSLCFGTEODTRCLKSVCFSLADPGGVLR, SWDFEN, .LTDGYICRFTGVCEWHPDENKILSLRLGNLGLQGFVVALQNCSSL       | 97  |
| JX198226 | MADDTKFLLLFLLSSSSLCFGSEDTLCLKSVYCSVIDPNSVLKSWIFED, .GTVGFTICRFTGVCEWHPDENKILSLRLGNLGLQGFVVALQNCSSV         | 98  |
| JX198227 | MADDTKFLLLFLLSSSSLCFGSEDTLCLKSVYCSVIDPNSVLKSWIFEN, .ATEGYICRFTGVCEWHPDENRVLVHLGNLGLQGFVVALQNCSSM           | 98  |
| JX198228 | MADDTKFLLLFLLSSSSLCFGSEDTLCLKSVYCSVIDPNSVLKSWIFEN, .ATEGYICRFTGVCEWHPDENRVLVHLGNLGLQGFVVALQNCSSM           | 98  |
| JX198229 | MADDTKFLLLFLLSSSSLCFGSEDTLCLKSVYCSVIDPNSVLKSWIFEYP, .REGYICRFTGVCEWHPDENKILSLRLGNLGLQGFVVALQNCSSL          | 98  |
| JX198230 | MADDTKFLLSVLLSSSSLCFGSEDTLCLKSVYCSVIDPNSVLKSWIFEN, .PYENYVICRFTGVCEWHPDENRVLVHLGNLGLQGFVVALQNCSSV          | 100 |
|          |                                                                                                            |     |
| JX198218 | TGLLELNNNFGSGPIPCDISRMPYLTSLDLSYNSFSGLTIPQNI SNMTYINLNLCHNQLSGQIPQFSLLRLLTRLTTFNVAGNLLSGFVETLLQK, FSSSNF   | 196 |
| JX198219 | TGLLELNNNFGSGPIPDIS, FLNPEYLYLDLSYNSFSGLEPSTINLLEYINLNLCHNQLSGQIPQFDLLLRLLTRLTTFNFTD, .....                | 177 |
| JX198220 |                                                                                                            |     |
| JX198221 |                                                                                                            |     |
| JX198222 | TGLLELNNNFGSGPIPCDISQVMPYLTSLDLSYNSFSGLTIPQNI SNMTYINLNLCHNQLSGQIPQFTLLLRLLTRLTTFNVAGNLLSGFVETLLQK, YBASNF | 196 |
| JX198223 | TGLLELNNNFGSGPIPCDISRMPYLTSLDLSYNSFSGLTIPQNI SNMTYINLNLCHNQLSGQIPQFSLLRLLTRLTTFNVAGNLLSGFVETLLQK, FSSSNF   | 196 |
| JX198224 | TGLLELNNNFGSGPIPCDISRMPYLTSLDLSYNSFSGLTIPQNI SNMTYINLNLCHNQLSGQIPQFSLLRLLTRLTTFNVAGNLLSGFVETLLQK, FSSSNF   | 196 |
| JX198225 | TGLLELNNNFGSGPIPCDISRMPYLTSLDLSYNSFSGLTIPQNI SNMTYINLNLCHNQLSGQIPQFSLLRLLTRLTTFNVAGNLLSGFVETLLQK, FSSSNF   | 196 |
| JX198226 | TGLLELNNNFGSGPIPCDISRQVPEYLYLDLSYNSFSGLTIPQNI SNMTYINLNLCHNQLSGQIPQFDLLLRLLTRLTTFNVAGNLLSGFVETLLQK, FPAWNE | 197 |
| JX198227 | TGLLELNNNFGSGPIPCDISRMPYLTSLDLSYNSFSGLTIPQNI SNMTYINLNLCHNQLSGQIPQFDLLLRLLTRLTTFNVAGNLLSGFVETLLQK, FPAWNE  | 197 |
| JX198228 | TGLLELNNNFGSGPIPCDISRQVPEYLYLDLSYNSFSGLTIPQNI SNMTYINLNLCHNQLSGQIPQFDLLLRLLTRLTTFNVAGNLLSGFVETLLQK, FSSSNF | 197 |
| JX198229 | TGLLELNNNFGSGPIPCDISRMPYLTSLDLSYNSFSGLTIPQNI SNMTYINLNLCHNQLSGQIPQFDLLLRLLTRLTTFNVAGNLLSGFVETLLQK, FPAWNE  | 197 |
| JX198230 | TGLLELNNNFGSGPIPCDISRQVPEYLYLDLSYNSFSGLTIPQNI SNMTYINLNLCHNQLSGQIPQFDLLLRLLTRLTTFNVAGNLLSGFVETLLQK, FPAWNE | 200 |
|          |                                                                                                            |     |
| JX198218 | AGNQLCGSEFLDGPSTFRRRWRPVRIRLHRLNDQSSIGAAVGFVVGFFVAFYFPHCFVCSERLRAYVVR                                      | 265 |
| JX198219 | ..NPKLCASEFMNDGPRSRWRPVRIRLHRLNDQSSIGAAVGFVVGFFVAFYFPHCFVCSERLRAYVVR                                       | 244 |
| JX198220 |                                                                                                            |     |
| JX198221 |                                                                                                            |     |
| JX198222 | AGNQLCGSEFLDDPPSRRRWRPVRIRLHRLNDQSSIGAAVGFVVGFFVAFYFPHCFVCSERLRAYVVR                                       | 265 |
| JX198223 | AGNQLCGSEFLDEGPTFRRRWRPVRIRLHRLNDQSSIGAAVGFVVGFFVAFYFPHCFVCSERLRAYVVR                                      | 265 |
| JX198224 | AGNQLCGSEFLDEGPTFRRRWRPVRIRLHRLNDQSSIGAAVGFVVGFFVAFYFPHCFVCSERLRAYVVR                                      | 265 |
| JX198225 | AGNQLCGSEFLDEGPTFRRRWRPVRIRLHRLNDESSIGAAVGFVVGFFVAFYFPHCFVCSERLRAYVVR                                      | 265 |
| JX198226 | DGNQLCGAESLDDGPRRRRWRPVRIRLHRLNDESSIGAAVGFVVGFFVAFYFPHCFVCSERLRAYVVR                                       | 266 |
| JX198227 | AGNQLCGSEFLDGTFRRRRWRPVRIRLHRLNDQSSIGAAVGFVVGFFVAFYFPHCFVCSERLRAYVVR                                       | 266 |
| JX198228 | AGNQLCGSEFLGECSTFRRRRWRPVRIRLHRLNDQSSIGAAVGFVVGFFVAFYFPHCFVCSERLRAYVVR                                     | 266 |
| JX198229 | DGNQLCGAESLDDGPRRRRWRPVRIRLHRLNDESSIGAAVGFVVGFFVAFYFPHCFVCSERLRAYVVR                                       | 266 |
| JX198230 | AGNQLCGSEFLDDPPSRRRWRPVRIRLHRLNDQSSIGAAVGFVVGFFVAFYFPHCFVCSERLRAYVVR                                       | 269 |

**Supplementary Fig. S5.** The multi-sequence alignment of the deduced proteins of the identified *RLP* genes from the stripe rust resistant wheat cv. 92R137 susceptible wheat cv. Yangmai158.

Supplementary Fig. S6

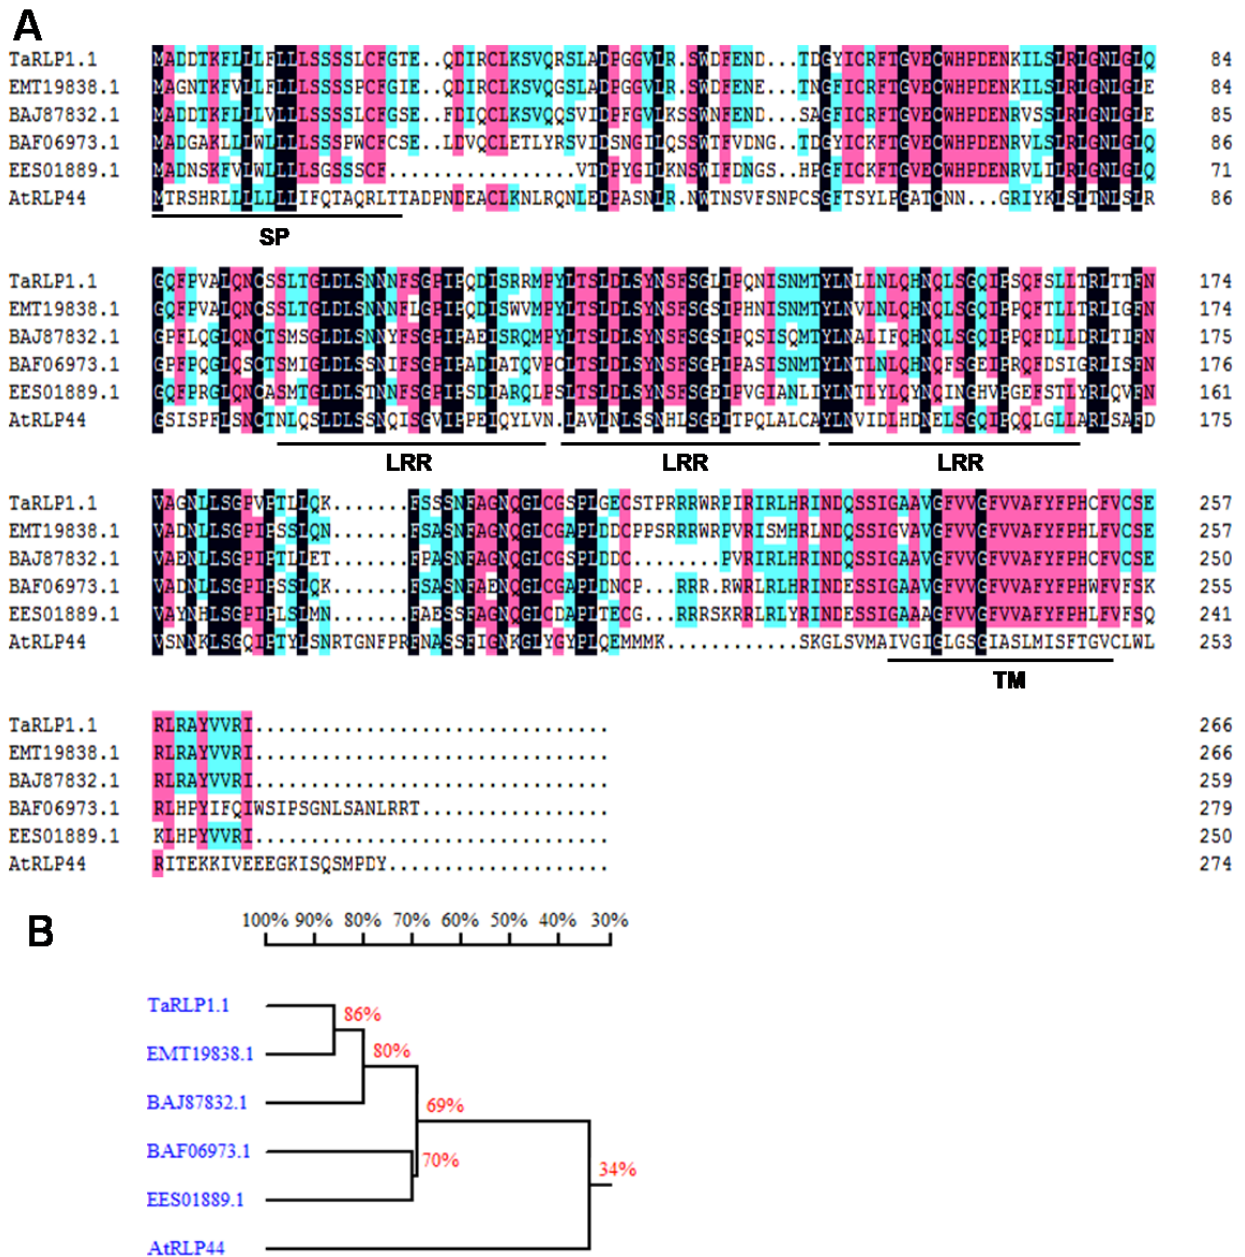

**Supplementary Fig. S6.** Sequence alignment and phylogenetic analysis of TaRLP1.1 and other putative RLP proteins using DNAMAN. (A) Alignment of the amino acid sequence of *TaRLP1.1* with other putative RLP proteins from *Oryza sativa* (BAF06973.1), *Hordeum vulgare* (BAJ87832.1), *Aegilops tauschii* (EMT19838.1) *Arabidopsis* (AtRLP44, AEE78586.1 and *Sorghum bicolor* (EES01889.17). Identical residues in all organisms are shaded. Underlines indicate sequence domains involved RLPs. (B) A representative phylogenetic tree of TaRLP1.1 and selected putative RLP proteins.

**Supplementary Fig. S7.**

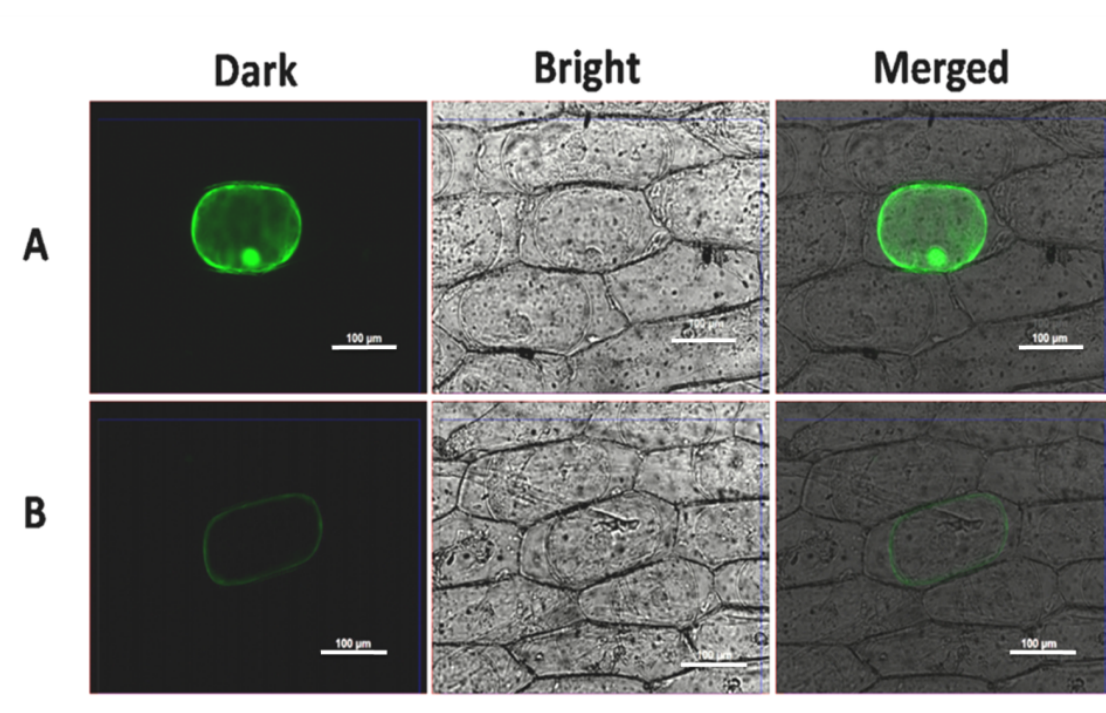

**Supplementary Fig. S7.** Subcellular localization of TaRLP1.1 protein. Onion epidermal cells were transformed with plasmids expressing the fusion protein and green fluorescent protein (GFP) by bombardment. All images were observed with a confocal microscope. (A) Onion epidermal cells expressing the GFP alone driven by the 35 S promoter. (B) Onion epidermal cells expression the TaRLP1.1-GFP fusion protein (Bars=100μm).

Supplementary Fig. S8

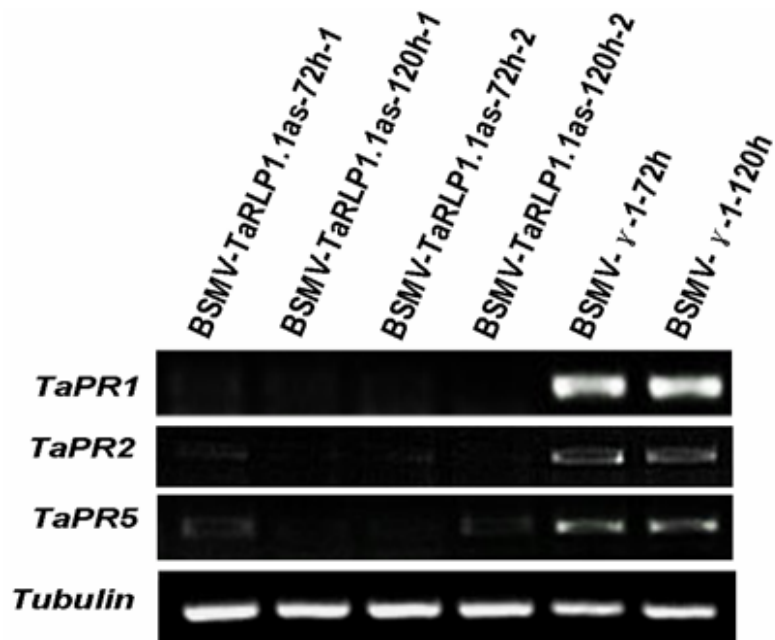

**Supplementary Fig. S8.** Expression analysis by the semi-quantitative RT-PCR of three pathogenesis-related genes, including *TaPR1*, *TaPR2* and *TaPR5*, at both 72 and 120 h after CYR32 inoculation in the BSMV: TaRLP1.1as infected plants and the BSMV infected control plants. *Tubulin* gene was used as the internal control.

Supplementary Fig. S9

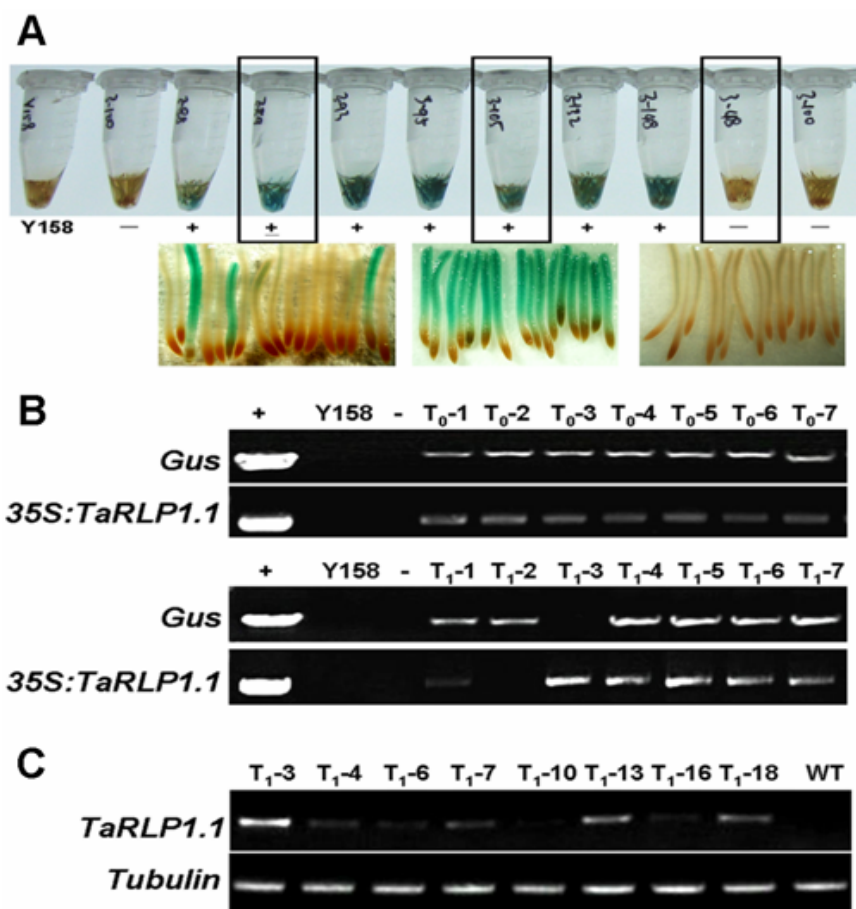

**Supplementary Fig. S9.** Identification of the positive transgenic plants by GUS staining, gene detection and gene expression analysis. (A) GUS staining of the root tips of the T<sub>1</sub> generation transgenic lines. ‘+’ means positive GUS staining and ‘-’ means negative GUS staining. (B) *Gus* and *TaRLP1.1* detection in some of the T<sub>0</sub> and T<sub>1</sub> plants by PCR. ‘+’: the positive control using the vector as the template; ‘-’: the negative control using H<sub>2</sub>O as the template. (C) Expression analysis of the *TaRLP1.1* in the identified positive transgenic plants. *Tubulin* gene was used as the internal control.

Supplementary Fig. S10

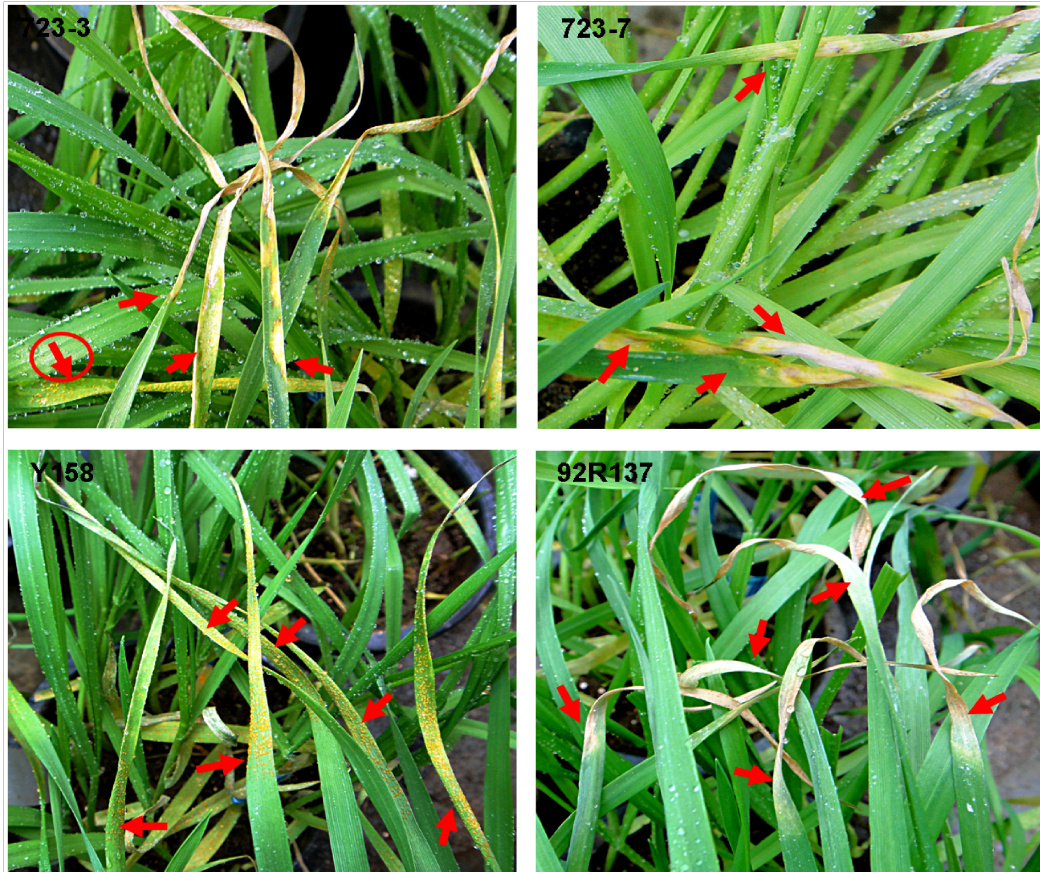

**Supplementary Fig. S10.** The positive *TaRLP1.1* transgenic plants showed robust hypersensitive response to the *Pst* 15 days after inoculation. The red arrowed indicated the inoculated leaves. 723-3 and 723-7 indicated T<sub>1</sub> generation plants of two individual T<sub>0</sub> plants, Y158 indicated the susceptible control Yang158, and 92R137 indicated the resistant control line.

Supplementary Fig. S11

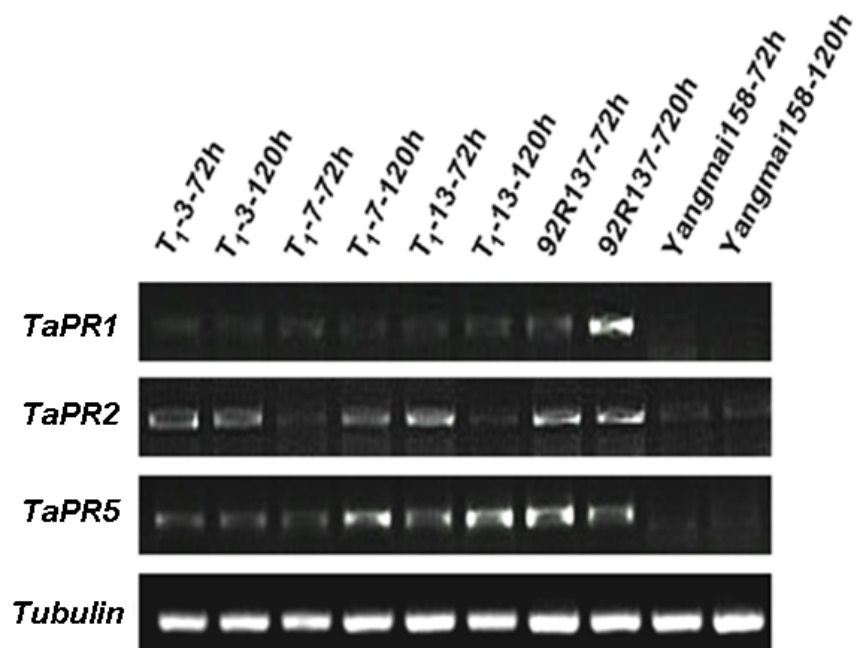

**Supplementary Fig. S11.** Expression analysis by the semi-quantitative RT-PCR of three pathogenesis-related genes, including *TaPR1*, *TaPR2*, and *TaPR5*, at both 72 and 120h after CYR32 inoculation in the *TaRLP1.1* over-expressed transgenic plants, the *Yr26* containing 92R137 and the susceptible recipient Yangmai158. *Tubulin* gene was used as the internal control.



## Supplementary Table

**Table S1.** Designed primers

|                                                                   | Primer Name                          | Primer Sequence (5' to 3')        |
|-------------------------------------------------------------------|--------------------------------------|-----------------------------------|
| RT-PCR primers for homolog cloning                                | Ta.22666.2.S1-EST-F                  | CAGCTGACATCTCTGGATCT              |
|                                                                   | Ta.22666.2.S1-EST-R                  | CAGACGAAGCAGTGCGGAAG              |
| Primers for RACE                                                  | <i>TaRLP</i> -3'RACE-F               | TTGTTATCAGGGCCTGTTCC              |
|                                                                   | <i>TaRLP</i> -5'RACE-R               | GAAGTAGAAGGCCACCACGA              |
| Primers for full length sequence amplification                    | <i>TaRLP1.1</i> -FL-F                | TGGAATTGACAAGCTGCAAG              |
|                                                                   | <i>TaRLP1.1</i> -FL-R                | GGGGTAGCTATGCCAGACAA              |
| Primers for ORF amplification                                     | <i>TaRLP1.1</i> -ORF-F               | GATGGCTGATGATACCAAGT              |
|                                                                   | <i>TaRLP1.1</i> -ORF-R               | GAATCATATCCGGACGACGT              |
| Semi-quantitative RT-PCR primers                                  | <i>TaRLP1.1</i> -RT-F                | CATGGGGATGGCGGCTTCTG              |
|                                                                   | <i>TaRLP1.1</i> -RT-R                | GTAGAGTTTCACTGTGTTCC              |
| Primers for chromosome location of the <i>TaRLP1</i> family genes | <i>TaRLP1.1</i> -DW-F                | TGCCTGAAGTCTGTACAACGC             |
|                                                                   | <i>TaRLP1.1</i> -DW-R                | CTTCTGTAGCAAAGTAGGAAC             |
|                                                                   | <i>TaRLP1</i> <sub>804-1</sub> -DW-F | CTCCTCTTGAGCAGCTCATCA             |
|                                                                   | <i>TaRLP1</i> <sub>804-1</sub> -DW-R | CTTCTGTAGCAAAGTAGGAAC             |
|                                                                   | <i>TaRLP1</i> <sub>813</sub> -DW-F   | GGTACTTTGAAAATCCCTATCC            |
|                                                                   | <i>TaRLP1</i> <sub>813</sub> -DW-R   | TACTGCTAGCAAAGAAGGAAT             |
| Primers for Subcellular localization of <i>TaRLP1.1</i>           | <i>TaRLP1.1</i> -SL-F                | GCGTCGACCTGGAATTGACAAGCT<br>GCAAG |
|                                                                   | <i>TaRLP1.1</i> -SL-R                | CCCATGGAGGCTCGGAGCCTCTCGG<br>AGCA |
| Primers for VIGS vector construction                              | <i>TaRLP1.1</i> -VIGS-F              | GCTGCTAGCGATACGAATCAGGCTG<br>CACA |
|                                                                   | <i>TaRLP1.1</i> -VIGS-R              | GCTGCTAGCGGGGTAGCTATGCCAG<br>ACAA |
| Primers for over-expression vector                                | <i>TaRLP1.1</i> -WT-F                | CGCGGATCCATGGCTGATGATACCA<br>AG   |

|                                                                |                            |                                 |
|----------------------------------------------------------------|----------------------------|---------------------------------|
| construction                                                   | <i>TaRLP1.1</i> -WT-R      | CGAGCTCTCATATCCGGACGACGTA       |
| Primers for <i>TaRLP1.1</i> detection in the transgenic plants | 35S-F                      | AGTTCATTTCAATTTGGAGAGAACAC      |
|                                                                | <i>TaRLP1.1</i> -R         | GTTTGAAGACGAAAACCTTCTGTAGC      |
| Primers for <i>Gus</i> detection in the transgenic plants      | <i>Gus</i> -F              | AGTGTACGTATCACCGTTTGTGTGA<br>AC |
|                                                                | <i>Gus</i> -R              | ATCGCCGCTTTGGACATACCATCCGT<br>A |
| Primers for qRT-PCR of <i>TaRLP1.1</i>                         | <i>TaRLP1.1</i> -qPCR-F    | AGCTTTGTGGTTCACCTTTAGA          |
|                                                                | <i>TaRLP1.1</i> -qPCR-R    | CTCGGAGCCTCTCGGAGCAGAC          |
| Semi-quantitative RT-PCR primers for <i>TaPRs</i> gene         | <i>TaPR1</i> -F (AAK60565) | GAGAATGCAGACGCCCAAGC            |
|                                                                | <i>TaPR1</i> -R (AAK60565) | CTGGAGCTTGCAGTCGTTGATC          |
|                                                                | <i>TaPR2</i> -F (DQ090946) | GCAGCTCTACAGGTCCAAGG            |
|                                                                | <i>TaPR2</i> -R (DQ090946) | CGGCGATGTACTIONTGTGTTG          |
|                                                                | <i>TaPR5</i> -F (FG618781) | CAAGCAGTGGTATCAACGCAGAG         |
|                                                                | <i>TaPR5</i> -R (FG618781) | GTGAAGCCACAGTTGTTCTTGATG        |
| Primers for the internal control gene                          | <i>Tubulin</i> -RT-F       | AGAACACTGTTGTAAGGCTCAAC         |
|                                                                | <i>Tubulin</i> -RT-R       | GAGCTTTACTGCCTCGAACATGG         |
|                                                                | <i>18sRNA</i> -RT-F        | AACACTTCACCGGACCATTCA           |
|                                                                | <i>18sRNA</i> -RT-R        | CGTCCCTGCCCTTTGTACAC            |

**Table S2. The upregulated folds of Ta.22666.2.S1\_at and TaAffx.55699.1.S1\_at between the different samples of tests and the controls**

| Probes               | Controls       | Tests      |          |            |          |
|----------------------|----------------|------------|----------|------------|----------|
|                      |                | 92R137-12h | R236-12h | 92R137-36h | R236-36h |
| Ta.22666.2.S1        | R236-0h        | /          | 4.59     | /          | 8.00     |
|                      | Yangmai158-12h | 16.00      | 7.46     | /          | /        |
|                      | Yangmai158-36h | /          | /        | 4.00       | 4.92     |
| TaAffx.55699.1.S1_at | R236-0h        | /          | 3.73     | /          | 19.69    |
|                      | Yangmai158-12h | 6.49       | 3.73     | /          | /        |
|                      | Yangmai158-36h | /          | /        | 3.03       | 2.83     |

**Table S3.** The genes identified in the resistant 92R137 and Yangmai158

| Length | Gene                    | Accession No. | 92R137 |   | Yangmai158 |   |
|--------|-------------------------|---------------|--------|---|------------|---|
| 738 bp | TaRLP1 <sub>738</sub>   | JX198219      | +      |   | +          |   |
| 800 bp | TaRLP1 <sub>800-1</sub> | JX198220      | +      | * | +          | * |
|        | TaRLP1 <sub>800-1</sub> | JX198221      |        |   | +          |   |
| 801 bp | TaRLP1 <sub>801-2</sub> | JX198222      | +      |   | +          | * |
|        | TaRLP1 <sub>801-3</sub> | JX198223      | +      |   |            |   |
|        | TaRLP1 <sub>801-4</sub> | JX198224      | +      |   |            |   |
|        | TaRLP1.1                | JX198218      | +      | * |            |   |
|        | TaRLP1 <sub>801-5</sub> | JX198225      |        |   | +          |   |
| 804 bp | TaRLP1 <sub>804-1</sub> | JX198226      | +      |   | +          |   |
|        | TaRLP1 <sub>804-2</sub> | JX198227      | +      |   |            |   |
|        | TaRLP1 <sub>804-3</sub> | JX198228      | +      |   |            |   |
|        | TaRLP1 <sub>804-4</sub> | JX198229      |        |   | +          |   |
| 813 bp | TaRLP1 <sub>813</sub>   | JX198230      | +      | * | +          |   |

Note: The ‘+’ indicated that the gene was existed in the genome of 92R137 or Yangmai158, and ‘\*’ indicated that the gene was expressed in the corresponding materials respectively.
